# Supplementary material
Source: PubMed Central journal article supplement (PMC9680613)
Supplement: aem.00939-22-s0001.pdf [file aem.00939-22-s0001.pdf]

**Supplementary Table 1: Plasmids and Parts**

| <b>Addgene</b> | <b>Code</b> | <b>Origin</b> | <b>Regulator</b>   | <b>Reporter</b> | <b>Marker</b>   |
|----------------|-------------|---------------|--------------------|-----------------|-----------------|
| 172542         | pAVR4       | p15A          | VanR <sup>AM</sup> | mRFP            | Carbenicillin   |
| 172543         | pCLxR4      | ColA          | LuxR               | mRFP            | Carbenicillin   |
| 172544         | pDCyR4      | CloDF13       | CymR <sup>AM</sup> | mRFP            | Carbenicillin   |
| 172545         | pELIR4      | pBR322        | LacI               | mRFP            | Carbenicillin   |
| 172546         | pEVR4       | pBR322        | VanR <sup>AM</sup> | mRFP            | Carbenicillin   |
| 172547         | pELxR4      | pBR322        | LuxR               | mRFP            | Carbenicillin   |
| 172548         | pECyR4      | pBR322        | CymR <sup>AM</sup> | mRFP            | Carbenicillin   |
| 172549         | pAVR2       | p15A          | VanR <sup>AM</sup> | mRFP            | Kanamycin       |
| 172550         | pCLxR2      | ColA          | LuxR               | mRFP            | Kanamycin       |
| 172551         | pCVR2       | ColA          | VanR <sup>AM</sup> | mRFP            | Kanamycin       |
| 172552         | pCCyR2      | ColA          | CymR <sup>AM</sup> | mRFP            | Kanamycin       |
| 172553         | pCLIR2      | ColA          | LacI               | mRFP            | Kanamycin       |
| 172554         | pDCyR2      | CloDF13       | CymR <sup>AM</sup> | mRFP            | Kanamycin       |
| 172555         | pELIR2      | pBR322        | LacI               | mRFP            | Kanamycin       |
| 172557         | pCLxR6      | ColA          | LuxR               | mRFP            | Streptomycin    |
| 172558         | pDCyR6      | CloDF13       | CymR <sup>AM</sup> | mRFP            | Streptomycin    |
| 172559         | pDLIR6      | CloDF13       | LacI               | mRFP            | Streptomycin    |
| 172560         | pDLxR6      | CloDF13       | LuxR               | mRFP            | Streptomycin    |
| 172562         | pELIR6      | pBR322        | LacI               | mRFP            | Streptomycin    |
| 172563         | pAVR1       | p15A          | VanR <sup>AM</sup> | mRFP            | Chloramphenicol |
| 172564         | pALxR1      | p15A          | LuxR               | mRFP            | Chloramphenicol |
| 172565         | pACyR1      | p15A          | CymR <sup>AM</sup> | mRFP            | Chloramphenicol |
| 172566         | pALIR1      | p15A          | LacI               | mRFP            | Chloramphenicol |
| 172567         | pCLxR1      | ColA          | LuxR               | mRFP            | Chloramphenicol |
| 172568         | pDCyR1      | CloDF13       | CymR <sup>AM</sup> | mRFP            | Chloramphenicol |
| 172569         | pELIR1      | pBR322        | LacI               | mRFP            | Chloramphenicol |
| 172570         | pELxG4      | pBR322        | LuxR               | GFPmut3         | Carbenicillin   |
| 172571         | pEVG4       | pBR322        | VanR <sup>AM</sup> | GFPmut3         | Carbenicillin   |

**Supplementary Table 2: Regulatory Element Sources**

| <b>Part</b>                            | <b>Native Host</b>            | <b>Regulator Source</b> | <b>Promoter Source</b> |
|----------------------------------------|-------------------------------|-------------------------|------------------------|
| CymR <sup>AM</sup> /P <sub>CymRC</sub> | <i>Pseudomonas putida</i>     | sAJM.1506 (1–3)         | Synthetic (1, 3)       |
| LacI/P <sub>LacO-1</sub>               | <i>Escherichia coli</i>       | pTachHis                | iGEM                   |
| LuxR/P <sub>LuxB</sub>                 | <i>Aliivibrio fischeri</i>    | sAJM.1506 (3, 4)        | Synthetic (3, 4)       |
| VanR <sup>AM</sup> /P <sub>VanCC</sub> | <i>Caulobacter crescentus</i> | sAJM.1506 (3, 5, 6)     | Synthetic (3, 6)       |

**Supplementary Table 3: Inducers**

| <b>Inducer</b>                                | <b>Source</b> | <b>Solvent</b> | <b>Stock</b> | <b>Standard concentration</b> |
|-----------------------------------------------|---------------|----------------|--------------|-------------------------------|
| Cumate                                        | Sigma 268402  | EtOH           | 100 mM       | 100 $\mu$ M                   |
| IPTG                                          | Sigma I6758   | Water          | 1 M          | 100 $\mu$ M                   |
| N-(3-oxohexanoyl)<br>homoserine lactone (OC6) | Sigma K3007   | DMF            | 10 mM        | 10 $\mu$ M                    |
| Vanillate                                     | Sigma V2250   | EtOH           | 100 mM       | 100 $\mu$ M                   |

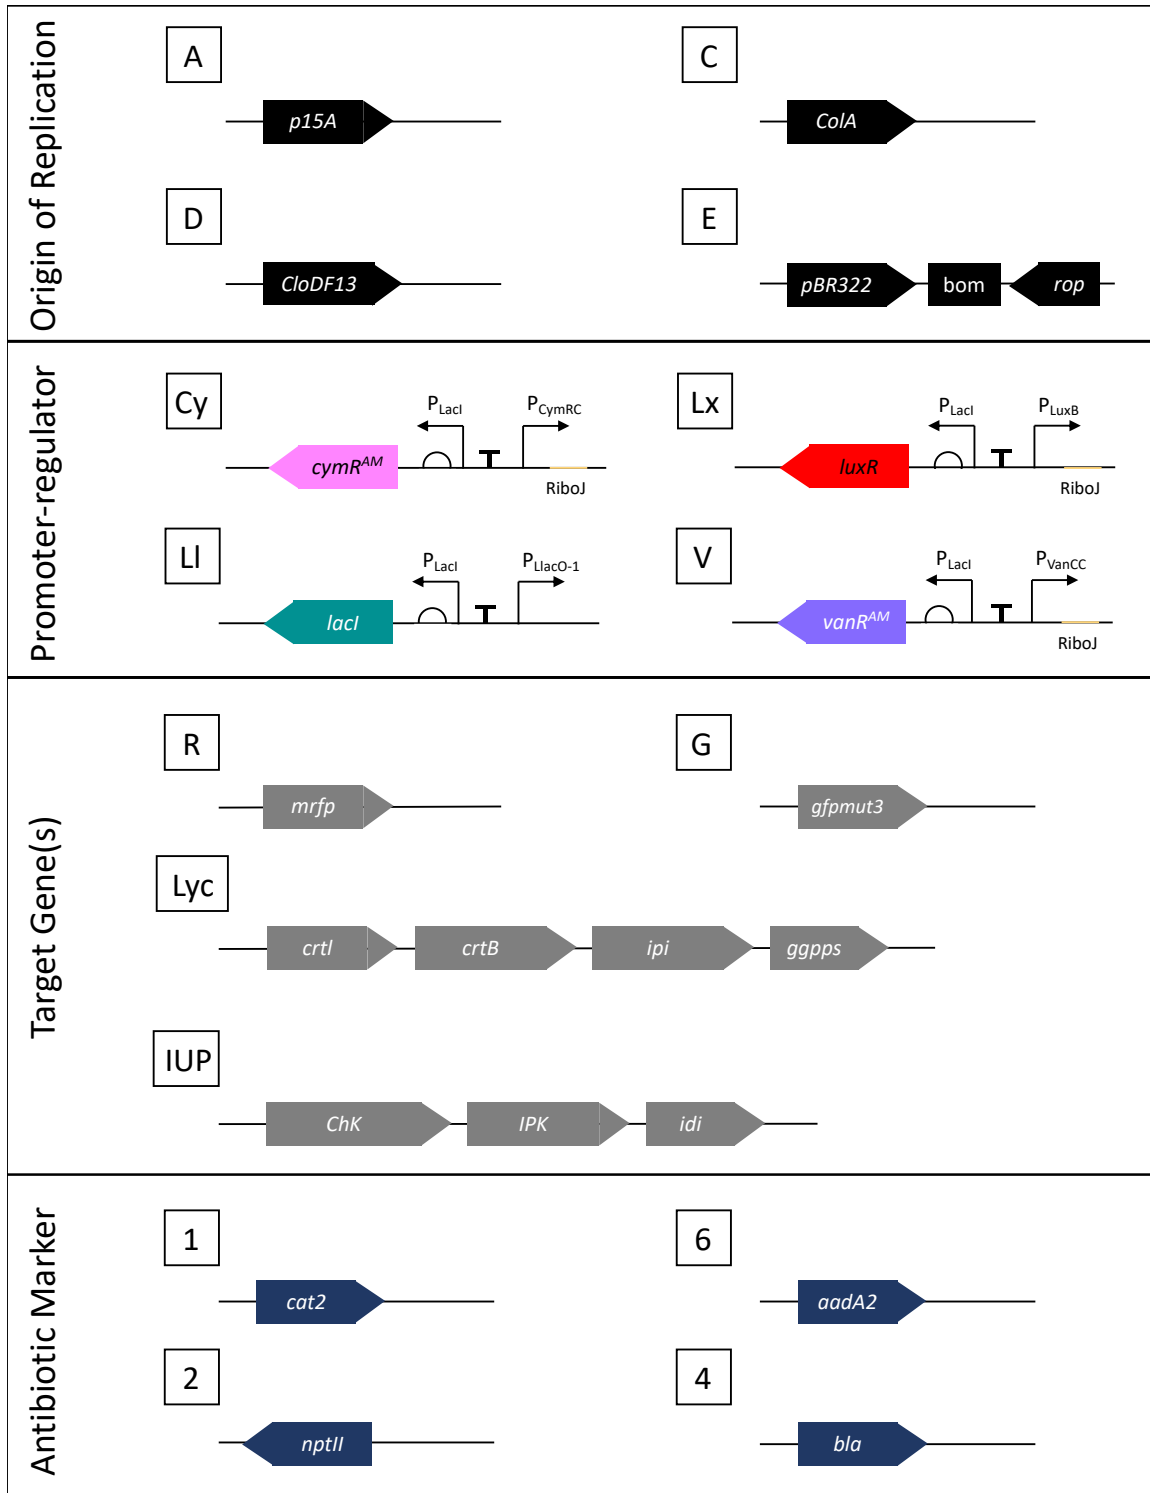

**Supplementary Figure 1:** Plasmid toolbox genetic parts included in study.

Origin parts: p15A (7), ColA (7), CloDF13 (7), and pBR322 (7). Promoter-regulator parts as described previously (8) and in Supplementary Table 1. Target gene(s) including mRFP (9), GFPmut3 (9), and operons of a previously described lycopene pathway (10). Marker parts including chloramphenicol resistance (11) (*cat2*), kanamycin resistance (11) (*nptII*), streptomycin resistance (7) (*aadA2*), and ampicillin resistance (11) (*bla*).

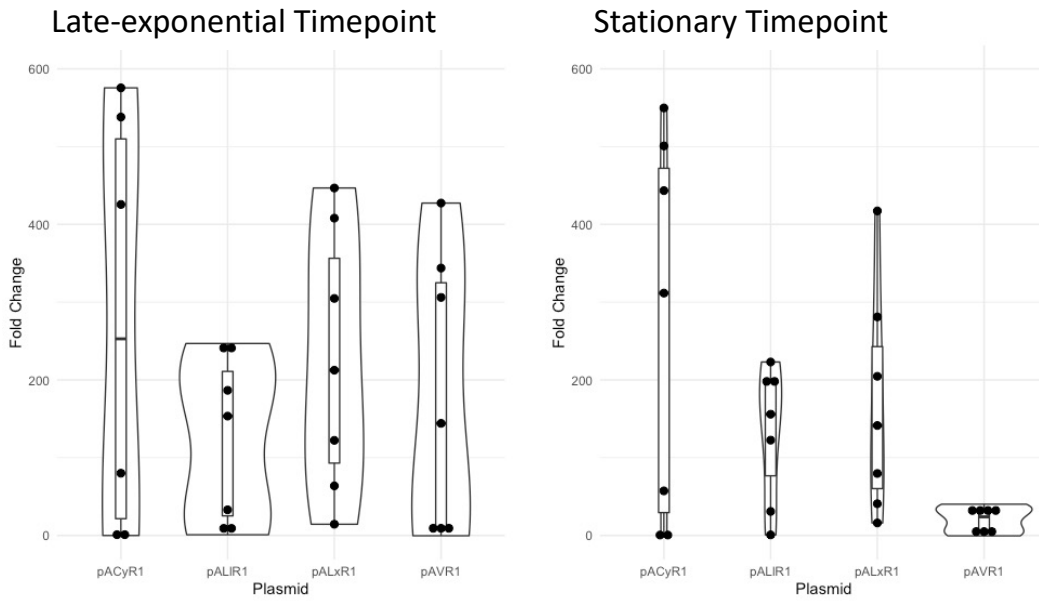

**Supplementary Figure 2:** Distribution of fold change across titrated inducer concentrations. Fold change data displayed as violin plots with inlaid boxplots to show distribution at two timepoints.

### A. Streaks from Day 11

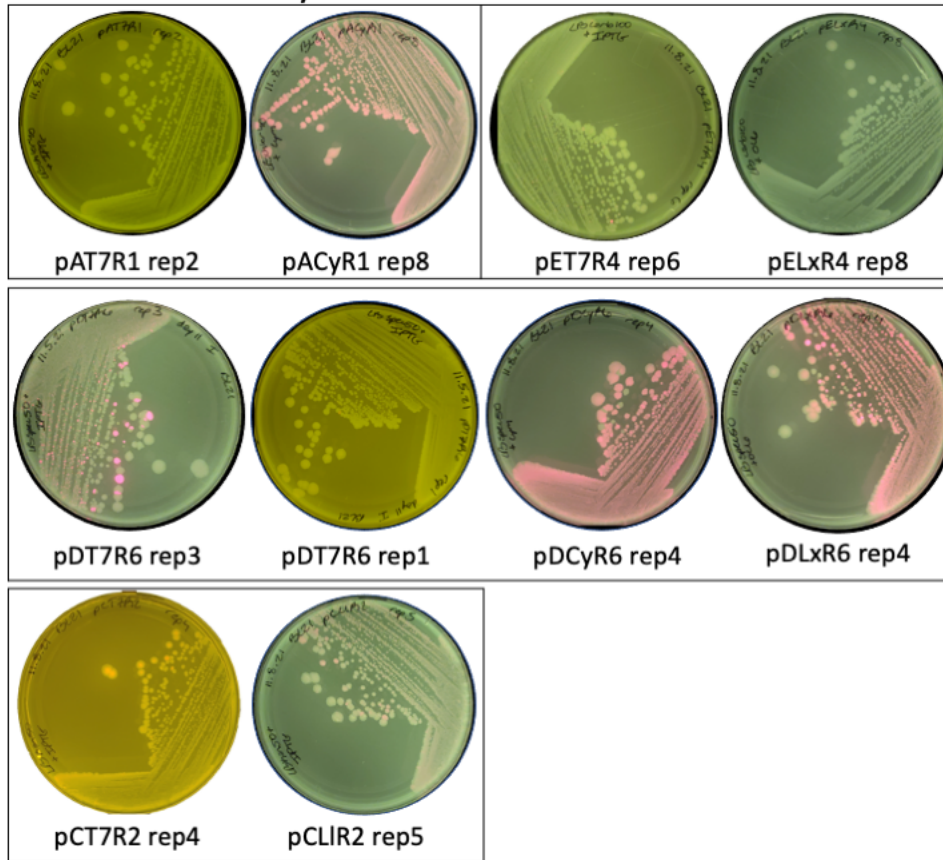

### B. Streaks from Glycerol Stocks

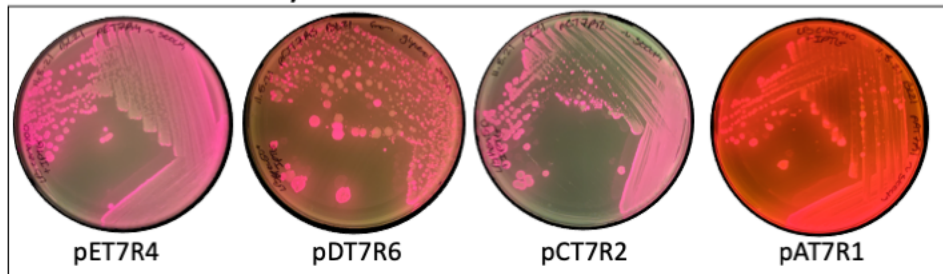

### Supplementary Figure 3: Stability Screen Plate Images.

(A.) Agar plates with selection were spread with cognate inducer and *E. coli* BL21(DE3) strains from day 11 of the extended passage experiment were struck out and photographed under blue light to visualize colonies with red fluorescence. (B.) Glycerol stocks of strains freshly transformed with Duet plasmids were struck on to selection plates spread with cognate inducer.

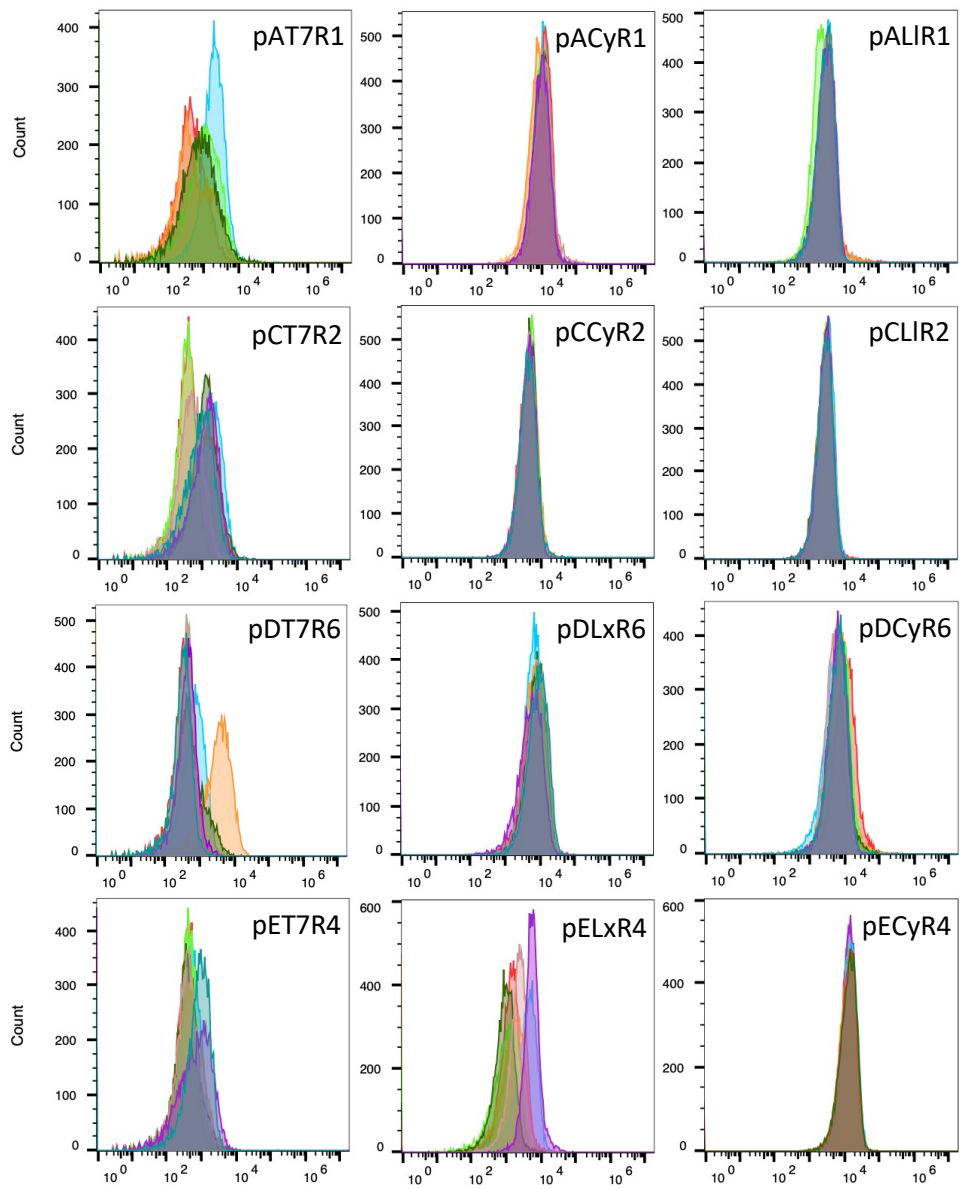

**Supplementary Figure 4:** Flow cytometry histograms.

Cultures from day 12 of the extended passage experiment were measured with flow cytometry and FlowJo v10 (TreeStar Inc.) was used to analyze the data. All replicates of each plasmid overlaid within each histogram with relative fluorescence displayed on the x-axis and cell count on the y-axis. Replicates with an OD < 0.2 excluded from dataset.

| Sample Name | Geometric Mean | CV   | Sample Name | Geometric Mean | CV  | Sample Name | Geometric Mean | CV  |
|-------------|----------------|------|-------------|----------------|-----|-------------|----------------|-----|
| pAT7R1.8    | 463            | 296  | pACyR1.8    | 8487           | 261 | pALIR1.8    | 2853           | 97  |
| pAT7R1.7    | 574            | 390  | pACyR1.7    | 10862          | 708 | pALIR1.7    | 2828           | 134 |
| pAT7R1.5    | 259            | 170  | pACyR1.6    | 8931           | 737 | pALIR1.6    | 2969           | 279 |
| pAT7R1.4    | 1727           | 373  | pACyR1.5    | 8857           | 112 | pALIR1.5    | 2909           | 216 |
| pAT7R1.3    | 254            | 357  | pACyR1.4    | 6958           | 187 | pALIR1.4    | 1934           | 199 |
|             |                |      | pACyR1.3    | 11156          | 113 | pALIR1.3    | 2758           | 402 |
|             |                |      | pACyR1.2    | 10458          | 143 | pALIR1.2    | 3134           | 91  |
|             |                |      | pACyR1.1    | 6215           | 151 | pALIR1.1    | 3240           | 429 |
| pCT7R2.8    | 500            | 181  | pCCyR2.8    | 4182           | 509 | pCLIR2.8    | 2726           | 49  |
| pCT7R2.7    | 646            | 113  | pCCyR2.7    | 4081           | 53  | pCLIR2.7    | 2870           | 266 |
| pCT7R2.6    | 313            | 147  | pCCyR2.6    | 4130           | 54  | pCLIR2.6    | 2858           | 48  |
| pCT7R2.5    | 1009           | 166  | pCCyR2.5    | 4237           | 140 | pCLIR2.5    | 2778           | 48  |
| pCT7R2.4    | 228            | 457  | pCCyR2.4    | 4551           | 107 | pCLIR2.4    | 2840           | 62  |
| pCT7R2.3    | 514            | 2217 | pCCyR2.3    | 4580           | 73  | pCLIR2.3    | 2823           | 48  |
| pCT7R2.2    | 909            | 121  | pCCyR2.2    | 4331           | 59  | pCLIR2.2    | 3179           | 179 |
| pCT7R2.1    | 251            | 1273 | pCCyR2.1    | 3863           | 59  | pCLIR2.1    | 2721           | 415 |
| pDT7R6.8    | 234            | 173  | pDLxR6.8    | 7762           | 135 | pDCyR6.8    | 5494           | 89  |
| pDT7R6.7    | 370            | 359  | pDLxR6.7    | 4172           | 96  | pDCyR6.7    | 5670           | 80  |
| pDT7R6.6    | 339            | 137  | pDLxR6.6    | 6954           | 137 | pDCyR6.6    | 4800           | 162 |
| pDT7R6.5    | 379            | 1002 | pDLxR6.5    | 6550           | 65  | pDCyR6.5    | 5136           | 171 |
| pDT7R6.4    | 318            | 2329 | pDLxR6.4    | 6412           | 66  | pDCyR6.4    | 6140           | 146 |
| pDT7R6.3    | 1476           | 95   | pDLxR6.3    | 6090           | 238 | pDCyR6.3    | 5724           | 842 |
| pDT7R6.2    | 491            | 1049 | pDLxR6.2    | 5847           | 71  | pDCyR6.2    | 3302           | 232 |
| pDT7R6.1    | 220            | 89   | pDLxR6.1    | 5756           | 67  | pDCyR6.1    | 7960           | 470 |
| pET7R4.8    | 648            | 127  | pECyR4.7    | 12627          | 86  | pELxR4.7    | 5456           | 150 |
| pET7R4.7    | 351            | 745  | pECyR4.5    | 12349          | 68  | pELxR4.6    | 1993           | 201 |
| pET7R4.6    | 289            | 165  | pECyR4.4    | 11156          | 250 | pELxR4.5    | 935            | 603 |
| pET7R4.5    | 287            | 454  | pECyR4.3    | 12436          | 114 | pELxR4.4    | 795            | 166 |
| pET7R4.4    | 287            | 2700 | pECyR4.2    | 10890          | 75  | pELxR4.3    | 908            | 669 |
| pET7R4.3    | 314            | 2828 | pECyR4.1    | 12035          | 91  | pELxR4.2    | 2117           | 117 |
| pET7R4.2    | 376            | 100  |             |                |     | pELxR4.1    | 1317           | 304 |
| pET7R4.1    | 278            | 316  |             |                |     |             |                |     |

**Supplementary Table 4:** Flow cytometry statistics.

Statistical analysis for all replicates included in Supplementary Figure 4. Analysis completed using FlowJo v10 (TreeStar Inc.).



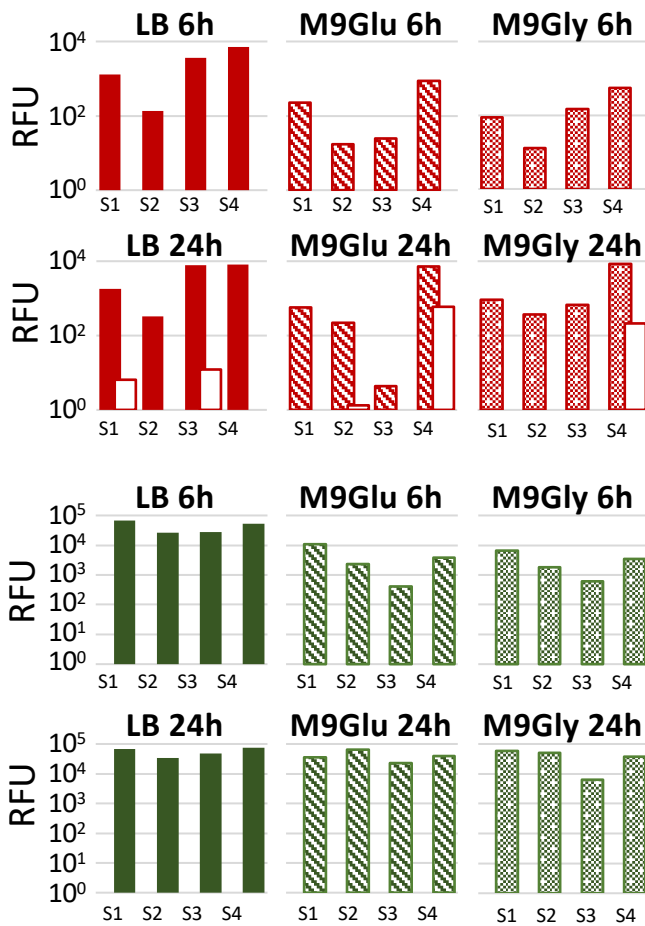

**Supplementary Figure 5:** Independent expression from strains with two plasmids in the presence of a single inducer. Toolbox plasmids were induced with the mRFP cognate inducer (top, red) or the GFP cognate inducer (bottom, green). Expression from the cognate inducer (solid and patterned bars) and expression from the non-cognate inducer (open bars). RFU data in is background and basal expression-subtracted. All data is the average of triplicates. Details in Supplementary Note 1.

## Supplementary Note 1: Independent induction of two-plasmid systems.

The induction of each toolbox system independently showed that only one promoter-regulator pair had a strong response with the non-cognate inducer (Supplementary Figure 5). While expression was maintained under 3-fold from the uninduced reporter in mS1, mS2, and mS3, there was notable mRFP expression from VanR<sup>AM</sup>/P<sub>VanCC</sub> in mS4 by stationary phase in the presence of the Lux inducer OC6. Here, mRFP induced by the non-cognate inducer expressed 80-fold over basal levels in M9Glu and 2-fold over basal expression in M9Gly, where leaky expression was very high by the 24h timepoint. When induced with only vanillate, VanR<sup>AM</sup>-regulated expression of mRFP in mS4 had the highest expression at late-exponential phase of all strains tested across culturing media, but high levels of basal expression reduced fold change by over 75% after overnight growth in LB and M9Gly. This is consistent with data from the VanR<sup>AM</sup>-regulated system across different backbones in single plasmid experiments in *E. coli* MG1655 (Figure 1D-E).

Independent expression after an overnight induction showed that the strain with the highest expression is inconsistent across media types (Supplementary Figure 5). While pEVR4 in mS4 has the highest overall induced expression of mRFP in both rich and minimal media, results are less consistent in different culturing conditions for GFP and the leakiness varies widely for both reporters. For example, the LuxR/P<sub>LuxB</sub> system in mS3 expresses mRFP over 320-fold after an overnight induction in LB but the fold change is 16 and 0 in M9Gly and M9Glu, respectively, due to leaky expression. Inconsistencies in leaky expression and overall inducibility across media types highlight the effect of host metabolism on the behavior of different inducible systems.

Similarly, expression levels from strains grown in minimal media supplemented with the two different carbon sources are not consistently higher in one over another. In general, mRFP-expressing plasmids had higher outputs when glycerol was used as the sole carbon source. Otherwise, induction profiles in M9Glu and M9Gly generally follow the same trends, with the exception of VanR<sup>AM</sup>-regulated expression of mRFP in M9Glu as mentioned above.

mS1, mS2, and mS3 possess the CymR<sup>AM</sup>/P<sub>CymRC</sub> and LuxR/P<sub>LuxB</sub> promoter-regulator pairs on different plasmid backbones. The same plasmid pELxG4 is present in both mS1 and mS2, providing a direct comparison of the effect of the second plasmid in each two-plasmid system. While our data suggests that the promoter-regulator has the largest effect on expression, plasmid copy number is also known to affect expression (12). Though the pCDFDuet-1 plasmid has a similar copy number to the pCOLADuet-1 plasmid, our data shows that pCCyR2 has higher overall expression at both late-exponential phase and stationary phase in all media types compared to pDCyR1, with fold change values over 15 times higher at both timepoints (Figure 1D-E).

We next compared expression amongst the toolbox plasmids, where strains mS1, mS2, and mS3 all possessed both Cy and Lx regulators, but differed by origin and marker (Figure 5). By stationary phase, independent expression of mRFP from pCCyR2 (mS1) and pDCyR1 (mS2) in LB was between 60 and 70-fold (Supplementary Figure 5), but interestingly mS2 expresses 2-fold higher in the presence of both OC6 and cumate compared to mS1 under the same conditions. These trends are echoed in the minimal media with mS2 exhibiting the highest fold change in mRFP expression of the four strains in the presence of both inducers. mS3 contains the same CymR<sup>AM</sup>/P<sub>CymRC</sub> and LuxR/P<sub>LuxB</sub> systems and here, pDLxR6 has the highest expression of mRFP in LB by stationary phase, both in the presence of only OC6 and in the presence of OC6

and cumate. Conversely, pACyG1 has the lowest expression of GFP in the presence of both inducers of all four toolbox strains in rich media, possibly due to the metabolic burden of the simultaneously induced LuxR/P<sub>LuxB</sub> system. Surprisingly, LuxR-regulated mRFP expression in mS3 at stationary phase was below 20-fold in M9Glu and M9Gly, partially due to a high level of leaky expression. Expression from pACyG1 in mS3 was not above background in the presence of both cumate and OC6, but when induced independently, expression was 91- and 23-fold in M9Glu and M9Gly respectively (Supplementary Figure 5). These induction profiles exemplify how changing plasmid pairings and culturing media influences independent and dual expression in multi-plasmid systems in unexpected ways.

## Supplementary References

1. Choi, Y.J., Morel, L., François, T. Le, Bourque, D., Lucie, B., Groleau, D., Massie, B. and Miguez, C.B. (2010) Novel, versatile, and tightly regulated expression system for *Escherichia coli* strains. *Appl. Environ. Microbiol.*, **76**, 5058–5066.  
<https://doi.org/10.1128/AEM.00413-10>
2. Stanton, B.C., Nielsen, A.A.K., Tamsir, A., Clancy, K., Peterson, T. and Voigt, C.A. (2014) Genomic mining of prokaryotic repressors for orthogonal logic gates. *Nat. Chem. Biol.*, **10**, 99–105.  
<https://doi.org/10.1038/nchembio.1411>
3. Meyer, A.J., Segall-Shapiro, T.H., Glassey, E., Zhang, J. and Voigt, C.A. (2019) *Escherichia coli* “Marionette” strains with 12 highly optimized small-molecule sensors. *Nat. Chem. Biol.*, **15**, 196–204.  
<https://doi.org/10.1038/s41589-018-0168-3>
4. Moon, T.S., Lou, C., Tamsir, A., Stanton, B.C. and Voigt, C.A. (2012) Genetic programs constructed from layered logic gates in single cells. *Nature*, **491**, 249–253.  
<https://doi.org/10.1038/nature11516>  
<http://www.ncbi.nlm.nih.gov/pubmed/23041931>
5. Kaczmarczyk, A., Vorholt, J.A. and Francez-Charlot, A. (2014) Synthetic vanillate-regulated promoter for graded gene expression in *Sphingomonas*. *Sci. Rep.*, **4**, 4–7.  
<https://doi.org/10.1038/srep06453>
6. Kunjapur, A.M. and Prather, K.L.J. (2019) Development of a Vanillate Biosensor for the Vanillin Biosynthesis Pathway in *E. coli*. *ACS Synth. Biol.*, **8**, 1958–1967.  
<https://doi.org/10.1021/acssynbio.9b00071>  
<http://www.ncbi.nlm.nih.gov/pubmed/31461264>
7. Held, D., Yaeger, K. and Novy, R. (2003) New coexpression vectors for expanded compatibilities in *E. coli*. *Innovations*.
8. Schuster, L.A. and Reisch, C.R. (2021) A plasmid toolbox for controlled gene expression across the Proteobacteria. *Nucleic Acids Res.*, **49**, 7189–7202.  
<https://doi.org/https://doi.org/10.1093/nar/gkab496>
9. Zhang, J.J., Tang, X., Zhang, M., Nguyen, D. and Moore, B.S. (2017) Broad-host-range expression reveals native and host regulatory elements that influence heterologous antibiotic production in Gram-negative bacteria. *MBio*, **8**, e01291-17.  
<https://doi.org/10.1128/mBio.01291-17>  
<http://www.ncbi.nlm.nih.gov/pubmed/28874475>
10. Chatzivasileiou, A.O., Ward, V., Edgar, S.M. and Stephanopoulos, G. (2019) Two-step pathway for isoprenoid synthesis. *Proc. Natl. Acad. Sci. U. S. A.*, **116**, 506–511.

<https://doi.org/10.1073/pnas.1812935116>  
<http://www.ncbi.nlm.nih.gov/pubmed/30584096>

11. Kovach, M.E., Elzer, P.H., Hill, D.S., Robertson, G.T., Farris, M.A., Roop, R.M. and Peterson, K.M. (1995) Four new derivatives of the broad-host-range cloning vector pBBR1MCS, carrying different antibiotic-resistance cassettes. *Gene*, **166**, 175–176.

12. Brewster, R.C., Weinert, F.M., Garcia, H.G., Song, D., Rydenfelt, M. and Phillips, R. (2014) The transcription factor titration effect dictates level of gene expression. *Cell*, **156**, 1312–1323.

<https://doi.org/10.1016/j.cell.2014.02.022>
